# Supplementary material
Source: publisher figshare collection journal article supplement (https://rs.figshare.com/ndownloader/files/7516210)
Supplement: Supplementary file 1 [file 7516210]

**(SR) microCT**

Segmentation ↓

**ITK-SNAP**

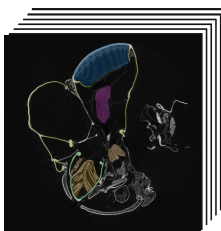

Export 3D volume data of head  
(Direct voxel conversion)

**VOX-FE /  
PARAVIEW**

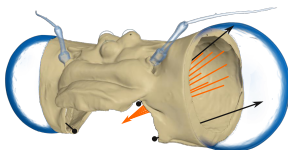

Export strain data for head  
capsule and endoskeleton

**VOX-FE /  
PARAVIEW**

Relation of character  
groups to a specific  
function

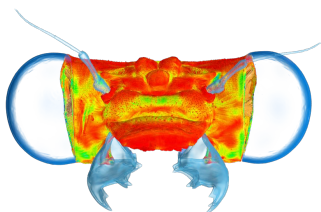

Export 3D surface  
model of head capsule,  
mandibles and muscles

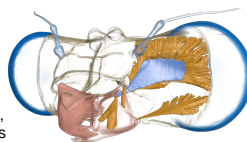

**Blender**

extract spatial information  
on muscle insertions and  
joint locations

Export joint  
reaction and  
muscle forces

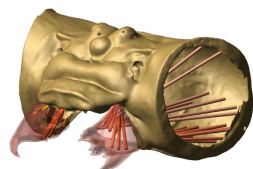

**ADAMS modelling  
system**

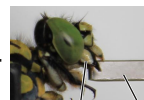

**Bite force  
measurements**

Mandible Force sensor

Testing for pairwise  
correlations in a  
character matrix  
containing these  
characters in coded  
states for all taxa

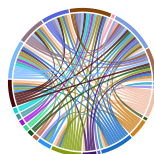

Matrix reduction  
according to  
highly significant  
pairwise  
correlations

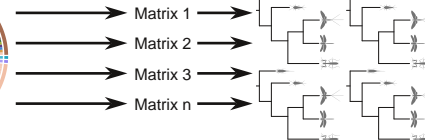

**Tree inference**
